# Supplementary material for: Chinese classical decoction Wuwei Xiaodu Drink alleviates gout arthritis by suppressing NLRP3-Mediated inflammation
Source: PubMed Central journal article supplement (PMC11310048; doi:10.3389/fphar.2024.1388753), 2024-07-26

## Supplementary Material

### Supplementary Figures and Tables

#### 1.1 Supplementary Figures

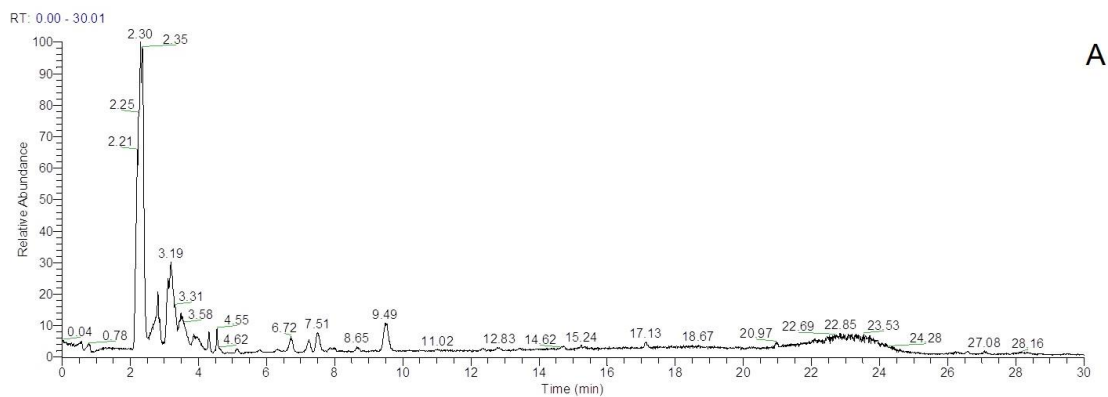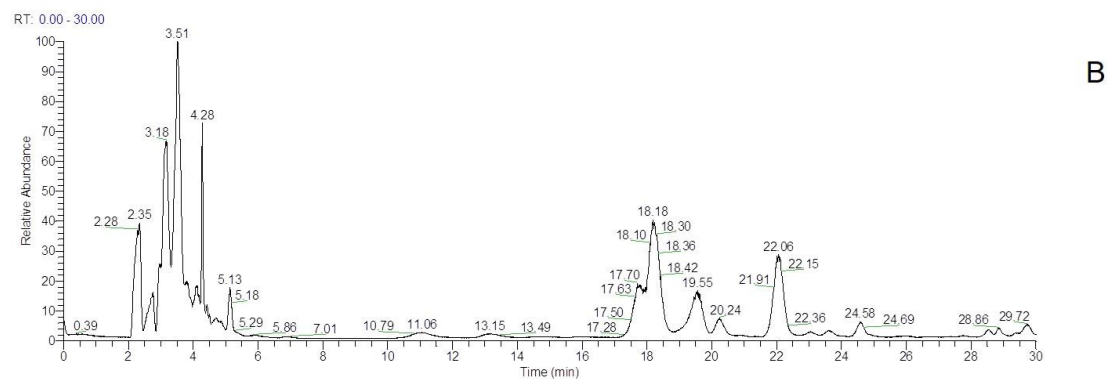

**Supplementary Figure 1 HPLC analysis of WWXDD:** The BPC of WWXDD in positive (A) and negative (B) mode.

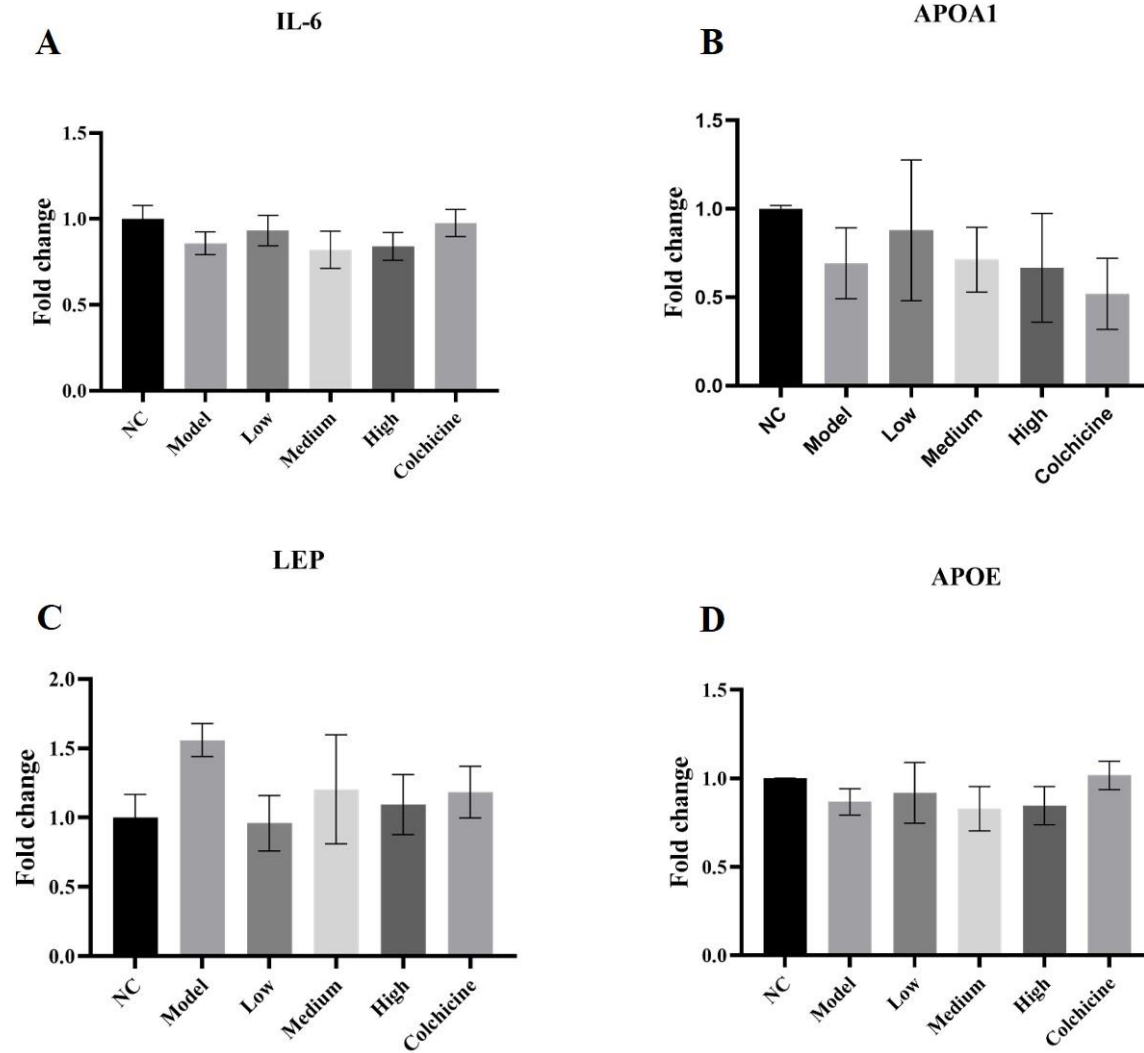

**Supplementary Figure 2** Expression of WWXDD on core target genes in inflamed joint tissues of MUS-induced arthritis rats by RT-PCR. There was no significant difference in the expression of IL-6, APOA1, APOE, and LEP among all groups.

**A**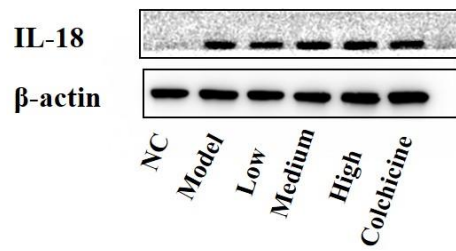**B**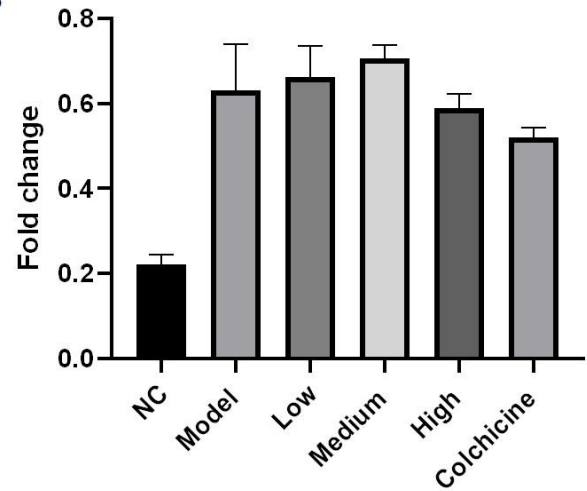

**Supplementary Figure 3** Expression of WWXDD on IL-18 protein expression in inflamed joint tissues of MUS-induced arthritis rats. The findings revealed that there was no substantial variation in the levels of IL-18 expression among the Model, WWXDD, and Colchicine groups.

## 1.2 Supplementary table

Table 1: Mass spectrometry information of chemical components in Wuwei Xiaodu Drink

| No. | Name                                                | RT (min) | Formula                                         | Ion Type           | Molecular Ion ( <i>m/z</i> ) | Structure                                                                             |
|-----|-----------------------------------------------------|----------|-------------------------------------------------|--------------------|------------------------------|---------------------------------------------------------------------------------------|
| 1   | 3,4,5-Tricaffeoylquinic acid                        | 14.667   | C <sub>34</sub> H <sub>30</sub> O <sub>15</sub> | [M+H] <sup>+</sup> |                              | 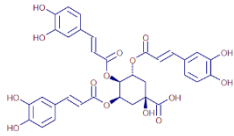   |
| 2   | 3,4-O-Dicaffeoyl quinic acid methyl ester           | 17.19    | C <sub>26</sub> H <sub>26</sub> O <sub>12</sub> | [M-H] <sup>-</sup> | 179.0551                     |    |
| 3   | 3-O-Caffeoylshikimic acid                           | 7.467    | C <sub>16</sub> H <sub>16</sub> O <sub>8</sub>  | [M+H] <sup>+</sup> | 375.1271                     |    |
|     |                                                     |          |                                                 | [M-H] <sup>-</sup> | 373.1134                     |                                                                                       |
| 4   | 3,4-dicaffeoylquinic acid                           | 14.672   | C <sub>25</sub> H <sub>24</sub> O <sub>12</sub> | [M+H] <sup>+</sup> | 183.0862                     |  |
| 5   | 4-Hydroxybenzoic acid                               | 8.966    | C <sub>7</sub> H <sub>6</sub> O <sub>3</sub>    | [M+H] <sup>+</sup> | 343.1227                     |  |
|     |                                                     |          |                                                 | [M-H] <sup>-</sup> | 341.1083                     |                                                                                       |
| 6   | 4-Hydroxycinnamic acid                              | 9.466    | C <sub>9</sub> H <sub>8</sub> O <sub>3</sub>    | [M+H] <sup>+</sup> | 159.0512                     |  |
| 7   | 5-O-Coumaroylcaffeoylquinic acid                    | 16.753   | C <sub>25</sub> H <sub>24</sub> O <sub>11</sub> | [M+H] <sup>+</sup> | 193.0706                     |  |
| 8   | 5-p-Coumaroylquinic acid                            | 9.521    | C <sub>16</sub> H <sub>18</sub> O <sub>8</sub>  | [M+H] <sup>+</sup> | 139.0389                     |  |
| 9   | 6,6-dimethyl-bicyclic [3.1.1] hept-2-ene-2-ethanol. | 20.998   | C <sub>11</sub> H <sub>18</sub> O               | [M+H] <sup>+</sup> | 110.0604                     |  |
| 10  | 7-epi-Vogeloside                                    | 10.699   | C <sub>17</sub> H <sub>24</sub> O <sub>10</sub> | [M+H] <sup>+</sup> | 193.0343                     |  |

|    |                                                                   |        |                                                               |                                                                                       |
|----|-------------------------------------------------------------------|--------|---------------------------------------------------------------|---------------------------------------------------------------------------------------|
| 11 | 7-O-Ethylsweroside                                                | 7.423  | C <sub>18</sub> H <sub>26</sub> O <sub>10</sub>               | 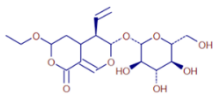   |
| 12 | 7-hydroxy-8-methoxycoumarin                                       | 13.919 | C <sub>10</sub> H <sub>8</sub> O <sub>4</sub>                 |    |
| 13 | 8-Epi-loganic acid                                                | 8.094  | C <sub>16</sub> H <sub>24</sub> O <sub>10</sub>               |    |
| 14 | Adenosine                                                         | 3.341  | C <sub>10</sub> H <sub>13</sub> N <sub>5</sub> O <sub>4</sub> |    |
| 15 | Apigenin                                                          | 20.976 | C <sub>15</sub> H <sub>10</sub> O <sub>5</sub>                |   |
| 16 | Apigenin 6-C-alpha-L-arabinopyranoside-8-C-beta-D-glucopyranoside | 6.797  | C <sub>26</sub> H <sub>28</sub> O <sub>16</sub>               |  |
| 17 | Artemitin                                                         | 9.364  | C <sub>20</sub> H <sub>20</sub> O <sub>8</sub>                |  |
| 18 | Butylidene phthalide                                              | 22.113 | C <sub>12</sub> H <sub>12</sub> O <sub>2</sub>                |  |
| 19 | Caffeic acid                                                      | 9.652  | C <sub>9</sub> H <sub>8</sub> O <sub>4</sub>                  |  |

---

|    |                                 |        |                                                 |                                                                                       |
|----|---------------------------------|--------|-------------------------------------------------|---------------------------------------------------------------------------------------|
| 20 | Centauroside                    | 13.46  | C <sub>34</sub> H <sub>46</sub> O <sub>19</sub> | 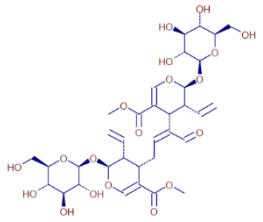   |
| 21 | Chlorogenic acid butyl ester    | 5.141  | C <sub>20</sub> H <sub>26</sub> O <sub>9</sub>  |    |
| 22 | Chrysin                         | 13.457 | C <sub>15</sub> H <sub>10</sub> O <sub>4</sub>  |    |
| 23 | Chrysoeriol                     | 21.185 | C <sub>16</sub> H <sub>12</sub> O <sub>6</sub>  |    |
| 24 | Chrysoeriol 7-O-glucopyranoside | 14.824 | C <sub>22</sub> H <sub>22</sub> O <sub>11</sub> |  |
| 25 | Corymbosin                      | 7.497  | C <sub>19</sub> H <sub>18</sub> O <sub>7</sub>  |  |
| 26 | Dihydrocaffeic acid             | 20.837 | C <sub>9</sub> H <sub>10</sub> O <sub>4</sub>   |  |
| 27 | Ehretioside                     | 6.934  | C <sub>14</sub> H <sub>17</sub> NO <sub>7</sub> |  |

---

|    |                             |        |                                                               |                                                                                       |
|----|-----------------------------|--------|---------------------------------------------------------------|---------------------------------------------------------------------------------------|
| 28 | Eriodictyol                 | 13.727 | C <sub>15</sub> H <sub>12</sub> O <sub>6</sub>                | 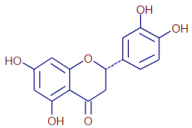   |
| 29 | Ethyl caffeate              | 11.225 | C <sub>11</sub> H <sub>12</sub> O <sub>4</sub>                |    |
| 30 | Flavoyadorinin B            | 19.426 | C <sub>23</sub> H <sub>24</sub> O <sub>11</sub>               |    |
| 31 | Glucose                     | 3.132  | C <sub>6</sub> H <sub>12</sub> O <sub>6</sub>                 |    |
| 32 | Guanosine                   | 3.532  | C <sub>10</sub> H <sub>13</sub> N <sub>5</sub> O <sub>5</sub> |   |
| 33 | Hederagenin                 | 17.967 | C <sub>30</sub> H <sub>48</sub> O <sub>4</sub>                |  |
| 34 | Isorhamnetin 3-O-rutinoside | 7.93   | C <sub>28</sub> H <sub>32</sub> O <sub>16</sub>               |  |

---

|    |                                  |        |                      |                                                                                       |
|----|----------------------------------|--------|----------------------|---------------------------------------------------------------------------------------|
| 35 | Isorhamnetin 3-O-glucopyranoside | 16.468 | $C_{22}H_{22}O_{12}$ | 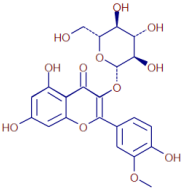   |
| 36 | Kaempferol 3-O-rutinoside        | 7.675  | $C_{27}H_{30}O_{15}$ |    |
| 37 | Kaempferol-3-O-rhamnoside        | 14.541 | $C_{21}H_{20}O_{10}$ |    |
| 38 | Loganin                          | 7.838  | $C_{17}H_{26}O_{10}$ |   |
| 39 | Lonfuranacid A                   | 16.464 | $C_{12}H_{20}O_5$    |  |
| 40 | Loniceracetalide A               | 16.813 | $C_{21}H_{32}O_{11}$ |  |
| 41 | Loniceroside A                   | 17.967 | $C_{52}H_{84}O_{21}$ |  |

---



|    |                                  |        |                                                  |                                                                                       |
|----|----------------------------------|--------|--------------------------------------------------|---------------------------------------------------------------------------------------|
| 42 | Loniceroside B                   | 17.565 | C <sub>58</sub> H <sub>94</sub> O <sub>25</sub>  | 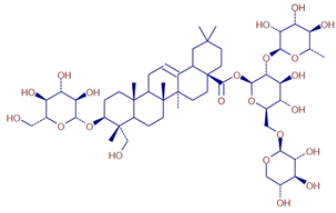   |
| 43 | Loniceroside C                   | 17.028 | C <sub>53</sub> H <sub>86</sub> O <sub>22</sub>  |    |
| 44 | Lonijaposide E                   | 3.108  | C <sub>25</sub> H <sub>32</sub> NO <sub>11</sub> |    |
| 45 | Macranthoside A                  | 17.964 | C <sub>47</sub> H <sub>76</sub> O <sub>17</sub>  |   |
| 46 | Methyl 4-hydroxycinnamate        | 5.141  | C <sub>10</sub> H <sub>10</sub> O <sub>3</sub>   |  |
| 47 | Neochlorogenic acid methyl ester | 10.239 | C <sub>17</sub> H <sub>20</sub> O <sub>9</sub>   |  |
| 48 | Prunetin                         | 17.143 | C <sub>16</sub> H <sub>12</sub> O <sub>5</sub>   |  |

---

|    |                               |        |                      |                                                                                       |
|----|-------------------------------|--------|----------------------|---------------------------------------------------------------------------------------|
| 49 | Quercetin 3-O-glucopyranoside | 13.727 | $C_{21}H_{20}O_{12}$ | 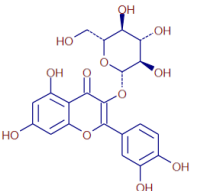   |
| 50 | Rhoifolin                     | 13.247 | $C_{27}H_{30}O_{14}$ |    |
| 51 | Rutin                         | 6.727  | $C_{27}H_{30}O_{16}$ |    |
| 52 | Secologanic acid              | 7.251  | $C_{16}H_{22}O_{10}$ |   |
| 53 | Secologanoside                | 4.533  | $C_{16}H_{22}O_{11}$ |  |
| 54 | Secoxyloganin                 | 7.646  | $C_{17}H_{24}O_{11}$ |  |
| 55 | Sucrose                       | 3.58   | $C_{12}H_{22}O_{11}$ |  |

---

|    |                                                    |        |                                                  |                                                                                       |
|----|----------------------------------------------------|--------|--------------------------------------------------|---------------------------------------------------------------------------------------|
| 56 | Sweroside                                          | 8.665  | C <sub>16</sub> H <sub>22</sub> O <sub>9</sub>   | 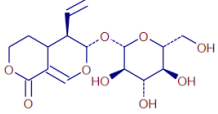   |
| 57 | syringic acid                                      | 4.902  | C <sub>9</sub> H <sub>10</sub> O <sub>5</sub>    |    |
| 58 | Syringin                                           | 7.822  | C <sub>17</sub> H <sub>24</sub> O <sub>9</sub>   |    |
| 59 | thalictroside                                      | 5.507  | C <sub>19</sub> H <sub>27</sub> NO <sub>12</sub> |    |
| 60 | trans-Cinnamic acid                                | 7.25   | C <sub>9</sub> H <sub>8</sub> O <sub>2</sub>     |   |
| 61 | Tricin                                             | 21.331 | C <sub>17</sub> H <sub>14</sub> O <sub>7</sub>   |  |
| 62 | Tricin 7-O-glucoside                               | 15.551 | C <sub>23</sub> H <sub>24</sub> O <sub>12</sub>  |  |
| 63 | Vanillic acid                                      | 6.727  | C <sub>8</sub> H <sub>8</sub> O <sub>4</sub>     |  |
| 64 | Vanillic acid 4-O-β-d-(6-O-benzoylglucopyranoside) | 14.942 | C <sub>21</sub> H <sub>22</sub> O <sub>10</sub>  |  |

---

|    |                              |        |                                                |                                                                                       |
|----|------------------------------|--------|------------------------------------------------|---------------------------------------------------------------------------------------|
| 65 | Eugenol                      | 17.531 | C <sub>10</sub> H <sub>12</sub> O <sub>2</sub> | 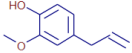   |
| 66 | Protocatechuic acid          | 5.596  | C <sub>7</sub> H <sub>6</sub> O <sub>4</sub>   |    |
| 67 | Quinate                      | 3.566  | C <sub>7</sub> H <sub>12</sub> O <sub>6</sub>  |    |
| 68 | Hydroxyphenylacetic Acid     | 6.496  | C <sub>8</sub> H <sub>8</sub> O <sub>3</sub>   |    |
| 69 | Ethyl P-Hydroxyphenylacetate | 19.205 | C <sub>10</sub> H <sub>12</sub> O <sub>3</sub> |    |
| 70 | Isorhamnetin                 | 19.223 | C <sub>16</sub> H <sub>12</sub> O <sub>7</sub> |   |
| 71 | Luteolin                     | 19.163 | C <sub>15</sub> H <sub>10</sub> O <sub>6</sub> |  |
| 72 | Elemicin                     | 8.184  | C <sub>12</sub> H <sub>16</sub> O <sub>3</sub> |  |
| 73 | Quercetin                    | 12.385 | C <sub>15</sub> H <sub>10</sub> O <sub>7</sub> |  |

---

|    |                   |        |                                                 |                                                                                       |
|----|-------------------|--------|-------------------------------------------------|---------------------------------------------------------------------------------------|
| 74 | Gallic Acid       | 7.806  | C <sub>7</sub> H <sub>6</sub> O <sub>5</sub>    | 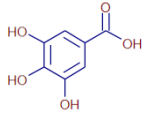   |
| 75 | Aesculetin        | 9.512  | C <sub>9</sub> H <sub>6</sub> O <sub>4</sub>    |    |
| 76 | Aesculin          | 6.494  | C <sub>15</sub> H <sub>16</sub> O <sub>9</sub>  |    |
| 77 | Chlorogenic Acid  | 7.494  | C <sub>16</sub> H <sub>18</sub> O <sub>9</sub>  |    |
| 78 | Phenylacetic Acid | 5.144  | C <sub>8</sub> H <sub>8</sub> O <sub>2</sub>    |    |
| 79 | Orientin          | 12.323 | C <sub>21</sub> H <sub>20</sub> O <sub>11</sub> |  |
| 80 | Ligustilide       | 8.184  | C <sub>12</sub> H <sub>14</sub> O <sub>2</sub>  |  |
| 81 | Ferulic acid      | 7.247  | C <sub>10</sub> H <sub>10</sub> O <sub>4</sub>  |  |

---

|    |                              |        |                       |                                                                                       |
|----|------------------------------|--------|-----------------------|---------------------------------------------------------------------------------------|
| 82 | Bis (2-ethylhexyl) phthalate | 28.137 | $C_{24}H_{38}O_4$     | 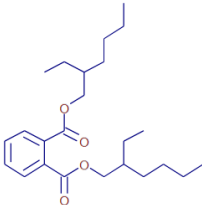   |
| 83 | p-Hydroxyphenethylalcohol    | 22.795 | $C_8H_{10}O_2$        |    |
| 84 | 7 $\alpha$ -Morrnionide      | 4.53   | $C_{17}H_{26}O_{11}$  |    |
| 85 | Lonijaposide B               | 4.507  | $C_{25}H_{32}NO_{12}$ |   |
| 86 | Lonijaposide D               | 20.21  | $C_{26}H_{32}NO_{13}$ |  |
| 87 | Lonijaposide F               | 19.059 | $C_{24}H_{30}NO_{11}$ |  |
| 88 | Secologanin dimethyl acetal  | 17.833 | $C_{19}H_{30}O_{11}$  |  |

---

---

89

Diacetin

16.809 C<sub>7</sub>H<sub>12</sub>O<sub>5</sub>

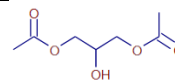

Supplement: DataSheet1.pdf [file DataSheet1.pdf]
